# Supplementary material
Source: publisher site journal article supplement (https://www.spandidos-publications.com/7131/downloadSupplementary)
Supplement: Supplementary file 1 [file downloadSupplementary]

## Sheet: Sheet1
Table SVIII. Associations among EGFR mutations, TP53 mutations, 6 demographic attributes, 3 conventional serum biomarkers, and 18 heavy metals were explored in NSCLC patients with hypertension (n=14) .
Tumor_Sample_Barcode	EGFR status ("0" means patients without EGFR mutations, "1" means patients with EGFR mutations)	TP53 status ("0" means patients without TP53 mutations, "1" means patients with TP53 mutations)	Gender ("0" means males, "1" means females)	Other chronic disease ("0" means patients without other chronic disease, "1" means patients with other chronic disease)	Smoking ("0" means patients without a history of smoking, "1" means smokers)	Drinking ("0" means patients without a history of drinking, "1" means drinkers)	Age (year)	BMI (kg/m^2)	CEA (ng/mL)	CYFRA21-1 (ng/mL)	NSE (ng/mL)	As (μg/L)	Ba (μg/L)	Cd (μg/L)	Cr (μg/L)	Co (μg/L)	Cu (μg/L)	Ga (μg/L)	Mn (μg/L)	Hg (μg/L)	Ni (μg/L)	Pb (μg/L)	Se (μg/L)	Sn (μg/L)	Sb (μg/L)	Sr (μg/L)	Tl (μg/L)	V (μg/L)	Zn (μg/L)
BT2010170021LNCTB	1	1	1	0	0	0	64	23.4375	16.52	7.37	12.32	0.59	0.28	0.36	1.65	0.09	738.89	0	8.42	0.01	0.73	10.87	124.72	0.01	0.72	18.66	0.01	0.29	4.11
BT2006040273LNCTB	0	1	1	1	0	0	39	29.3848	0.1	1.77	8.51	16.81	107.94	0	4.88	0.15	1051.23	0	12.53	0	0.97	10.31	156.26	0.25	1.13	26.47	0	0.52	5.88
BT2005270127LNCTB	1	0	1	0	0	0	79	21.7784	2.55	2.02	9.78	16.06	61.05	0.86	1.59	0.11	1071.73	0	7.25	0	0	8.48	235.74	0	0	36.14	0	0.15	6.68
BT2005230026LNCTB	1	1	0	1	0	0	72	22.2753	1.58	1.86	6.21	34.9	94.49	1.04	1.76	0.04	1094.18	0	6.77	0	2.73	8.81	120.26	0	0	28.15	0	0	6.8
BT2005170155LNCTB	0	1	0	1	1	1	58	25.9516	0.03	3	9.64	0	82.63	0.77	5.44	1.03	1165.09	0.48	17.44	0	2.57	4.11	168.89	0.03	0.95	18.11	0	0.09	5.88
BT2005080235LNCTB	1	1	1	0	0	0	52	21.2953	1.9	1.44	7.49	24.34	76.48	0.48	2.6	0.09	1176.15	0	16.95	0	1.6	7.68	239.47	0	0.24	32.31	0	0.21	7.96
BT2109020506LNCTB	0	1	0	0	1	1	82	21.5139	2.4	1.57	8.54	0.53	26.11	0.11	3.45	0.03	686.8	0.01	2.8	0.01	0.01	3.41	111.19	0.01	0.01	20.84	0.01	0.01	12.61
BT2108240244LNCTB	1	0	1	1	0	0	59	22.6562	1.9	1.61	12.6	0.85	1.11	0.52	2.67	0.07	1414.72	0.01	13.28	0.01	0.78	14.29	234.09	0.01	0.215	17.65	0.01	0.07	4.79
BT2108100331LNCTB	1	1	1	0	0	0	61	24.6094	1	0.85	11.5	5.33	35.67	0.31	2.38	0.01	577.02	0.01	13.32	4.22	0.01	24.39	271.63	0.01	0.01	18.5	0.01	0.64	13.975
BT2106170086LNCTB	1	0	0	1	1	1	54	24.8591	8.6	2.5	10.62	1.21	2.78	2.25	2.71	0.05	906.87	0.33	7.57	0.01	1.54	16.1	166.54	0.01	1.01	22.43	0.01	0.69	4.48
BT2106060005LNCTB	1	1	1	0	0	0	70	19.9219	0.261	3.56	22.92	0.01	7.13	0.94	3.69	0.09	1272.15	0.13	13.6	0.01	1.29	13.57	449.19	0.01	4.82	41.1	0.01	0.42	5.71
BT2005280039LNCTB	1	0	1	0	0	0	78	22.6562	11.3	3.22	7.24	39.09	113.72	1.17	1.05	0.17	1196.14	1.08	36.19	0	0.98	7.75	110.77	0	0.38	44.57	0.03	0.03	5.12
BT2012100061LNCTB	1	1	0	0	1	1	65	28.4053	21.6	6.4	13.89	0.54	49.74	0.23	2.19	0	704.09	0	9.56	0	1.06	15.09	191.88	0	0	16.54	0	0.12	6.4
BT2001190326LNCTB	0	0	1	1	0	0	63	25.3155	3	2.46	13.7	0.91	0	0.24	0.57	0	901.44	0	16.95	0	0	12.62	237.62	0.23	0.54	20.27	0	0.26	5.63
